# Supplementary material
Source: publisher figshare collection journal article supplement (https://frontiersin.figshare.com/ndownloader/files/15603557)
Supplement: Supplementary file [file 15603557]

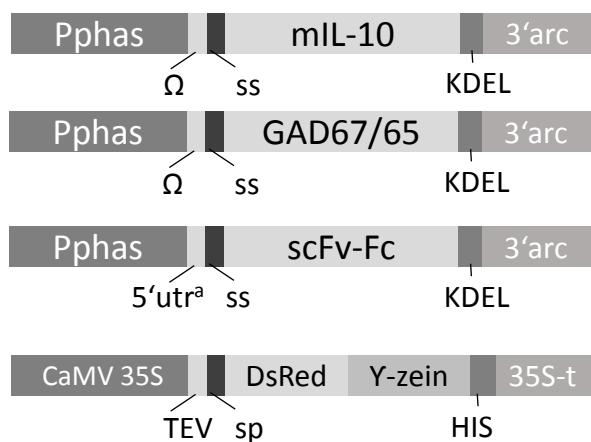

**Figure S1.** Schematic overview of the transgene cassettes used in the study. Pphas,  $\beta$ -phaseolin gene promoter (–1 to –1,470; GenBank accession no. J01263); 5' utr<sup>a</sup>, 5' UTR of *arc5-I* gene (13 bp; part of GenBank accession no. Z5020); 3' arc, 3'-flanking regulatory sequences of the *arc5-I* genomic clone (3,900 bp; part of GenBank accession no. Z50202); ss, signal peptide of the *Arabidopsis* 2S2 seed storage protein gene; scFv-Fc, scFv-Fc coding sequence; Ω leader, 5' untranslated region (UTR) of tobacco mosaic virus; KDEL, ER retention signal; TEV, *Tobacco etch virus* 5'-untranslated region; sp, plant codon-optimized signal peptide sequence derived from a murine antibody; DsRed, tetrameric DsRed; HIS, polyhistidine tag; CaMV35S and 35S-t, cauliflower mosaic virus 35s enhanced promoter and terminator; Y-zein, residues 4–93 of the mature 27 kDa  $\gamma$ -zein protein. Not drawn to scale. (Van Droogenbroeck et al., 2007; Morandini et al., 2011; Hofbauer et al., 2014)

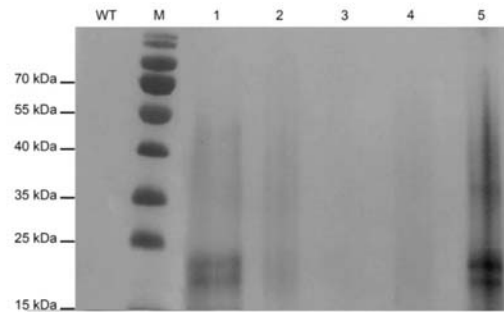

**Figure S2.** Sequential extraction of mIL-10. Salt extract (lane 1), third wash (lane 2), re-extraction of the pellet under denaturing conditions (25 mM Tris-HCl pH 7.8, 1.6% SDS; lanes 3 and 4), re-extraction of the pellet under reducing and denaturing conditions (25 mM Tris-HCl pH 7.8, 1.6% SDS, 100 mM DTT; lane 5), wild type (WT).

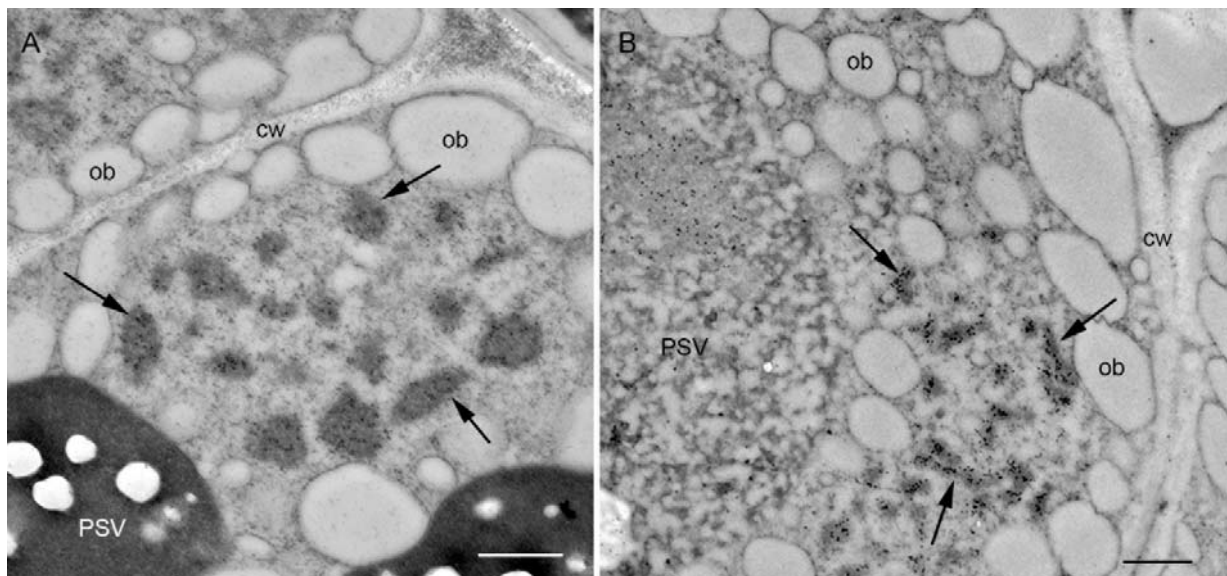

**Supplemental Figure S3. Localization of mIL-10 in *A. thaliana* cotyledon cells in lower expressing lines.** Murine IL-10 accumulates in Russell-like bodies in lines expressing 0.14 mg/g (A, arrows). Even in low expressing lines (0.05 mg/g), mIL-10 can be found in ER-derived structures (B, arrows), as well as in PSVs. Cell wall (cw), oil bodies (ob). Bars 0,5  $\mu$ m

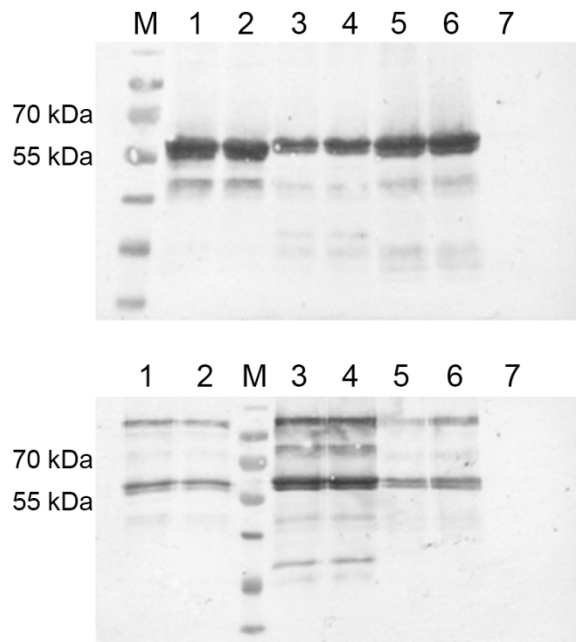

**Supplemental Figure S4.** Immunoblot of soluble and insoluble antibody fractions from seeds of *A. thaliana* lines expressing scFv-Fc antibodies MBP-10, HA78 or EHF34, Upper panel: soluble fraction using saline buffer. Lower panel: pellet re-extracted under reducing and denaturing conditons. Anti-Human IgG serum was used for detection. M- Marker, 1-MBP10-31-7, 2- MBP10-39-7-1, 3- HA78-6-8, 4- HA78-8-3, 5-EHF-34-10-4, 6-EHF-34-10-4, 7- WT
